# Supplementary material for: WNT ligands control initiation and progression of human papillomavirus-driven squamous cell carcinoma
Source: PubMed Central journal article supplement (PMC6033839; doi:10.1038/s41388-018-0244-x), 2018-04-17

# Supplementary Figure 2

a

Selected GO terms of first 1500 hits skin vs tumor

| GO biological process complete      | Gene number | Expected number | Fold Enrichment | P value  |
|-------------------------------------|-------------|-----------------|-----------------|----------|
| positive regulation of MAPK cascade | 66          | 29.91           | 2.21            | 4.54E-05 |
| regulation of cell migration        | 98          | 47.94           | 2.04            | 5.45E-07 |
| inflammatory response               | 63          | 27.09           | 2.33            | 1.74E-05 |

b

Malignancy markers  
Tumor vs Skin

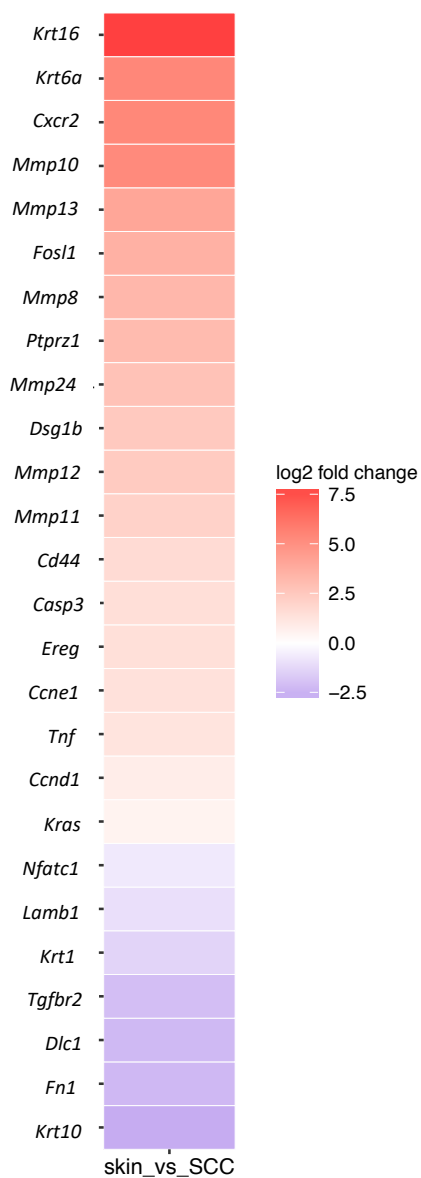

c

p-Erk

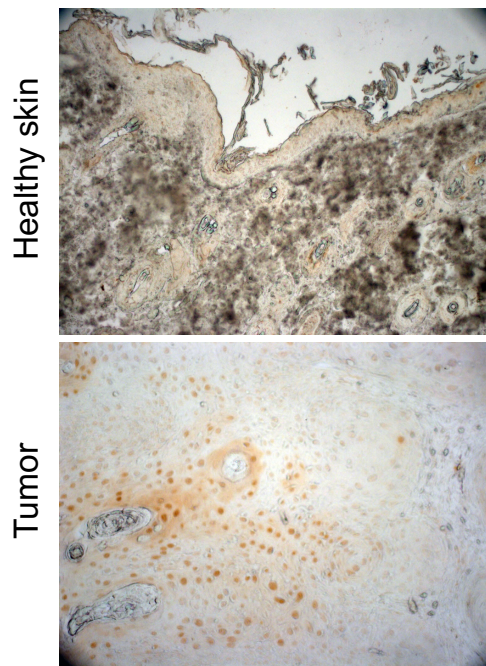

d

WNT secretory factors  
Tumor vs Skin

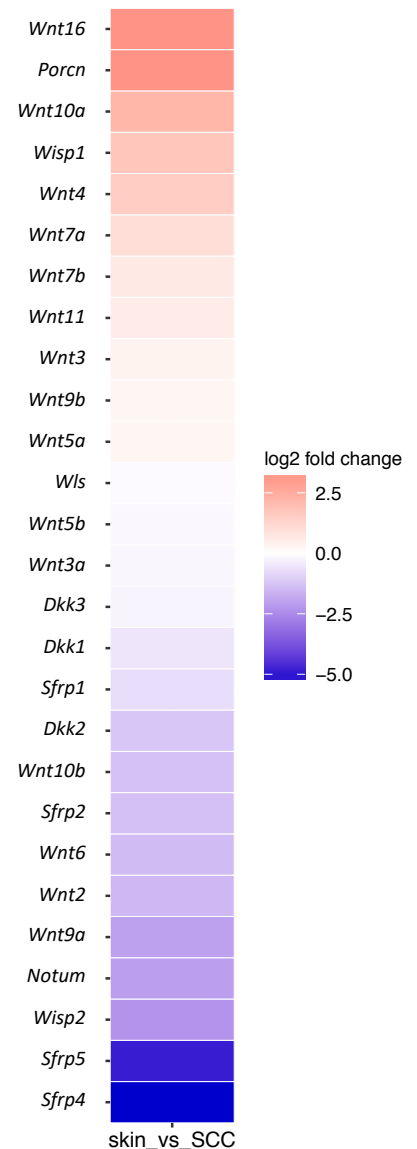

Supplement: 41388_2018_244_MOESM2_ESM.pdf [file 41388_2018_244_MOESM2_ESM.pdf]
