# Supplementary material for: WNT ligands control initiation and progression of human papillomavirus-driven squamous cell carcinoma
Source: PubMed Central journal article supplement (PMC6033839; doi:10.1038/s41388-018-0244-x), 2018-04-17

# Supplementary Figure 5

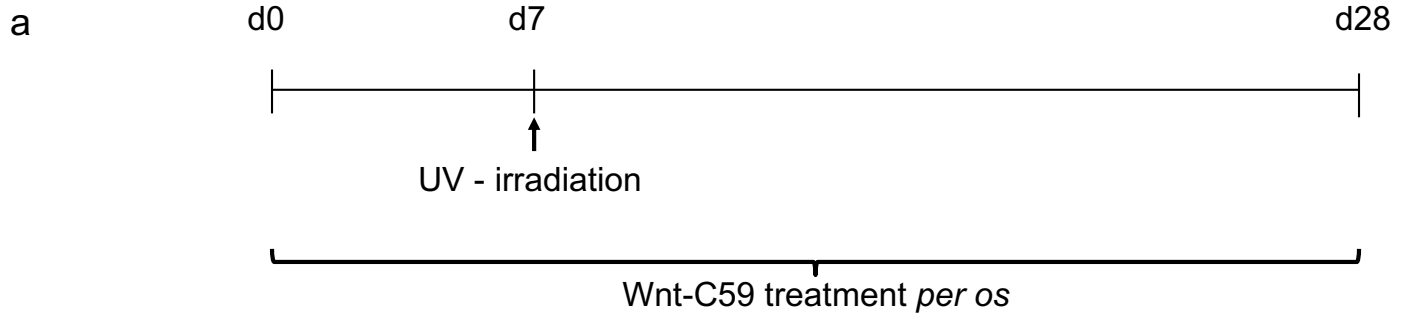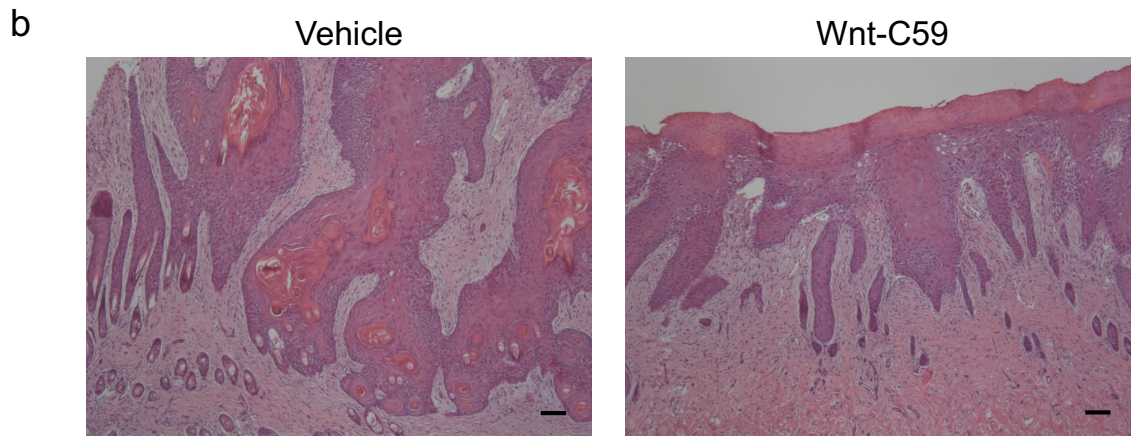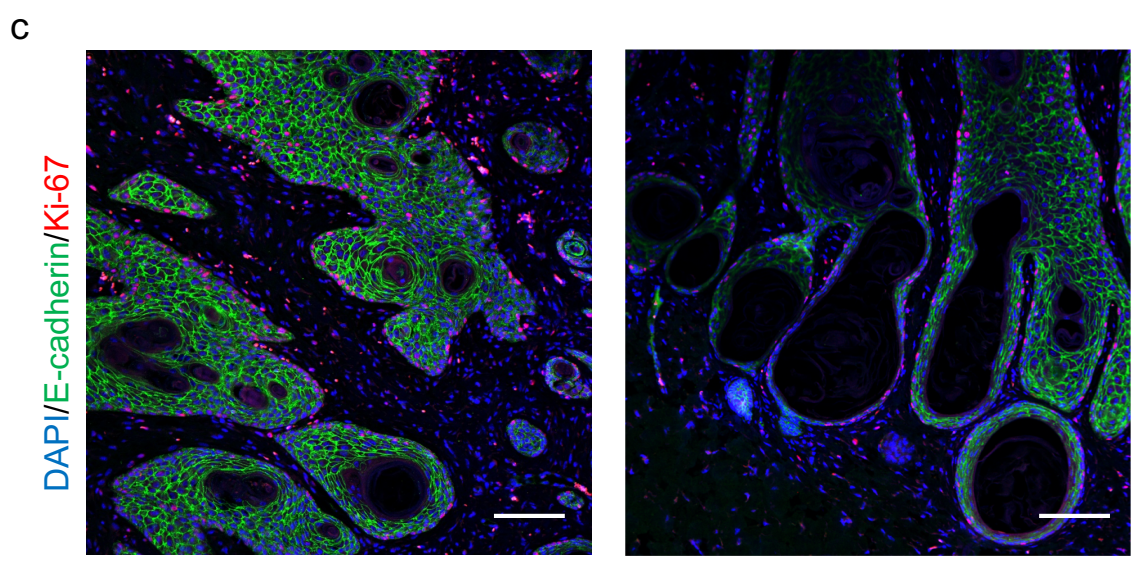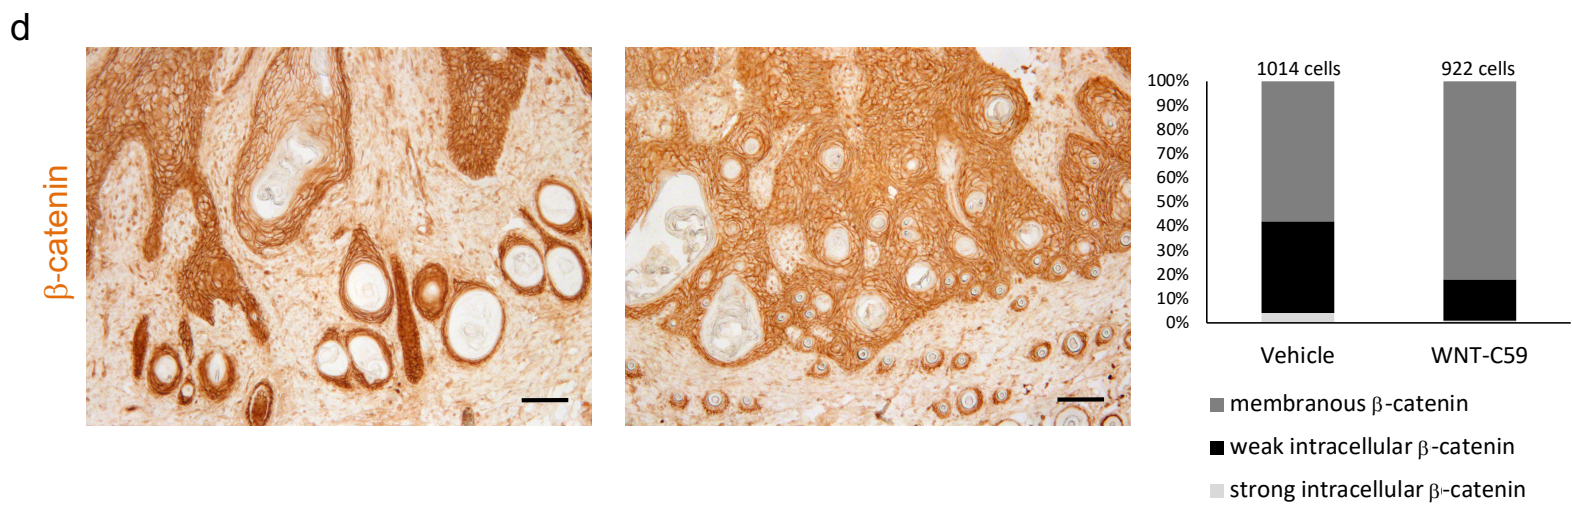

Supplement: 41388_2018_244_MOESM5_ESM.pdf [file 41388_2018_244_MOESM5_ESM.pdf]
