# Supplementary material for: WNT ligands control initiation and progression of human papillomavirus-driven squamous cell carcinoma
Source: PubMed Central journal article supplement (PMC6033839; doi:10.1038/s41388-018-0244-x), 2018-04-17
Supplement: 41388_2018_244_MOESM6_ESM.pdf [file 41388_2018_244_MOESM6_ESM.pdf]

# Supplementary Figure 6

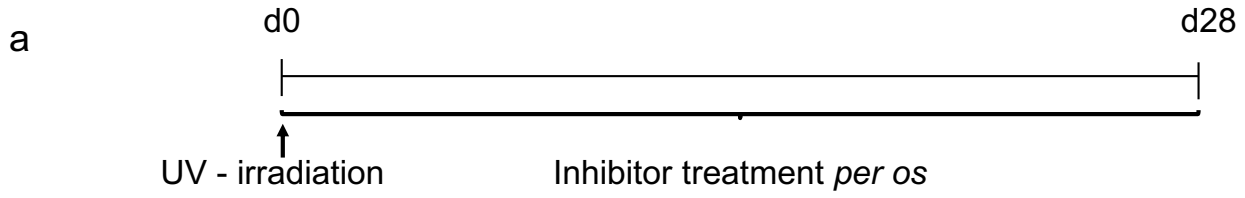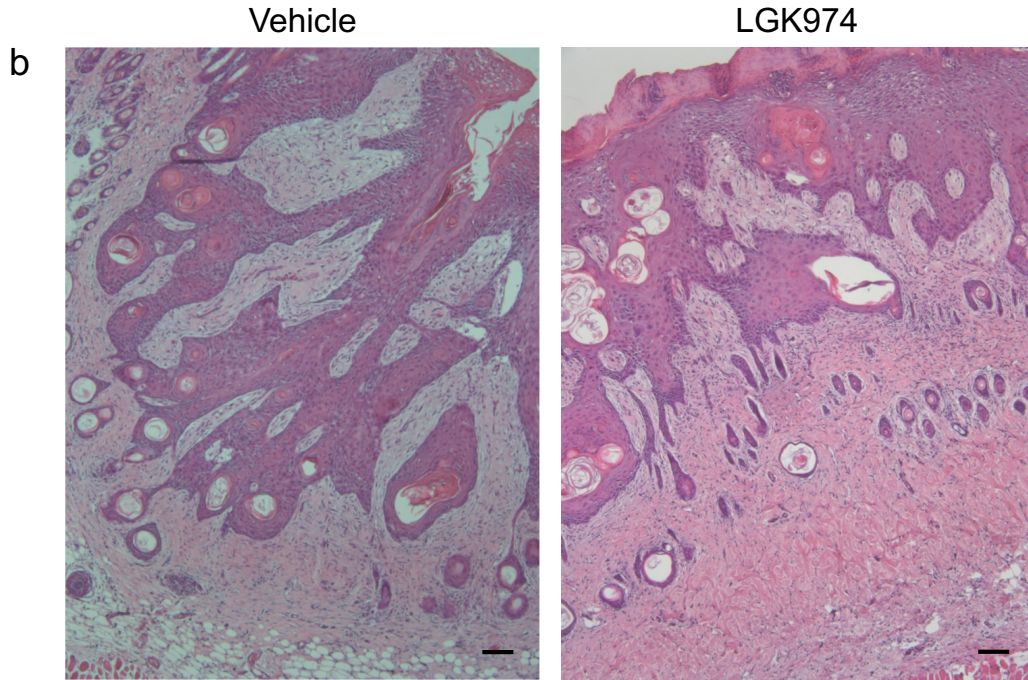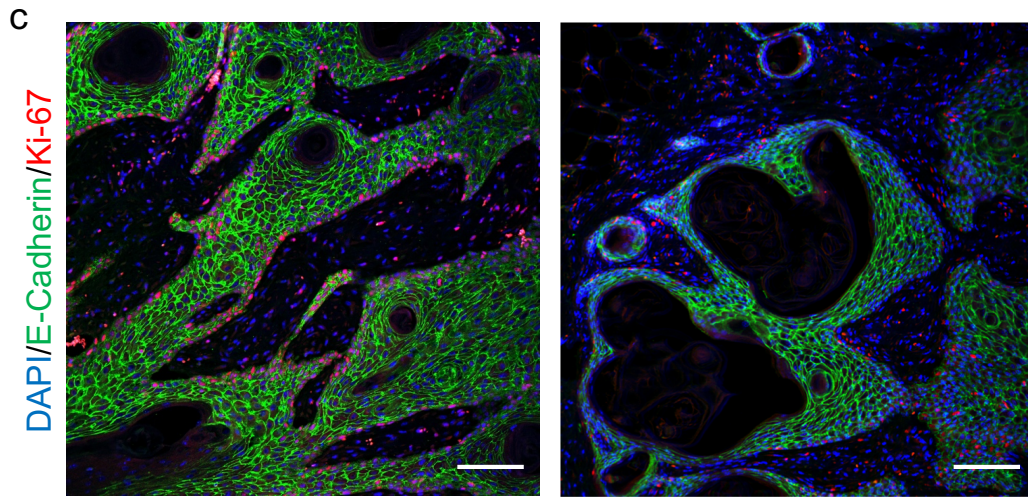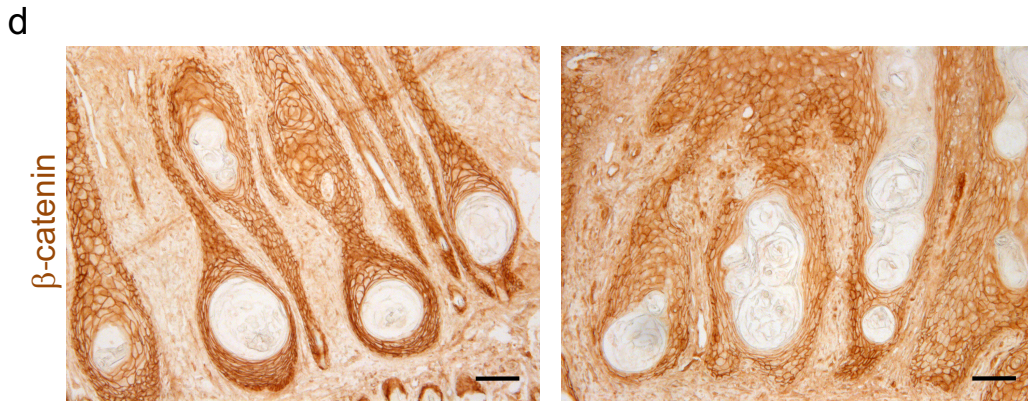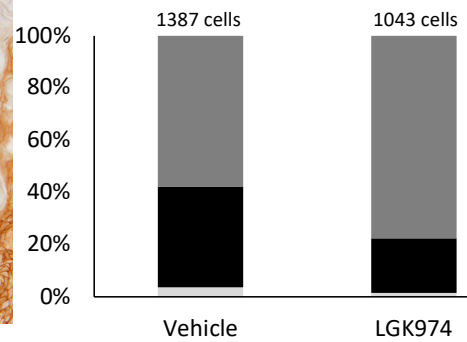

■ membranous  $\beta$ -catenin  
■ weak intracellular  $\beta$ -catenin  
■ strong intracellular  $\beta$ -catenin
