# Supplementary material for: WNT ligands control initiation and progression of human papillomavirus-driven squamous cell carcinoma
Source: PubMed Central journal article supplement (PMC6033839; doi:10.1038/s41388-018-0244-x), 2018-04-17

# Supplementary Figure 7

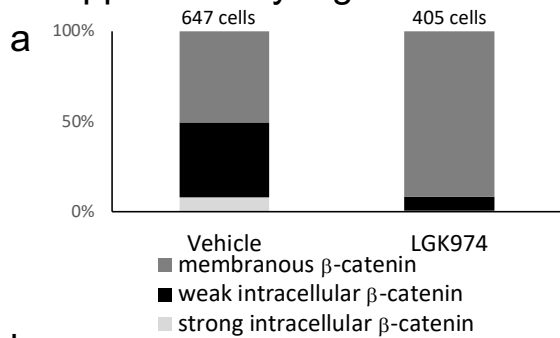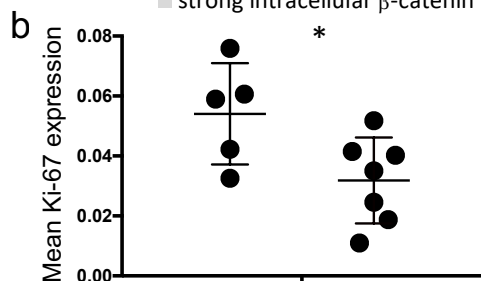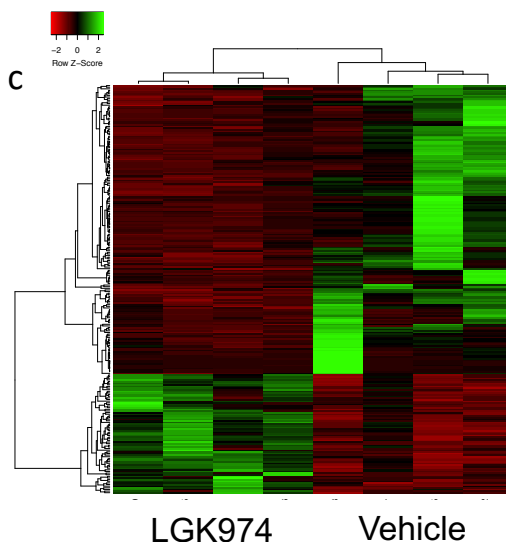

## e LGK974 vs Vehicle

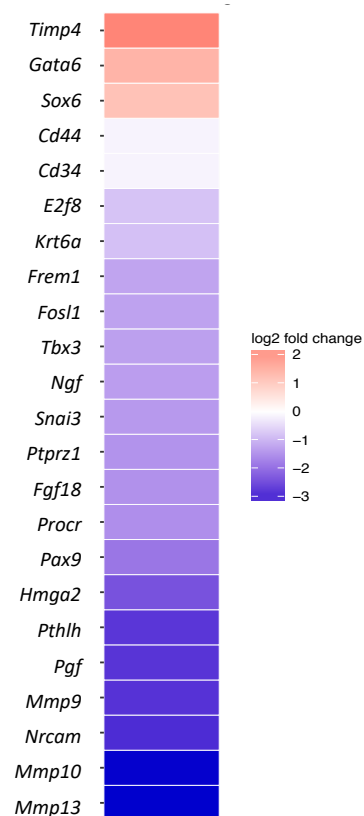

## d

| GO biological process complete: $p < 0.05$ vehicle vs Lgk974 | Gene number | Expected number | Fold Enrichment | P value  |
|--------------------------------------------------------------|-------------|-----------------|-----------------|----------|
| positive regulation of keratinocyte migration                | 4           | 0.09            | 45.74           | 1.78E-02 |
| positive regulation of cell proliferation                    | 28          | 9.36            | 2.99            | 2.48E-03 |

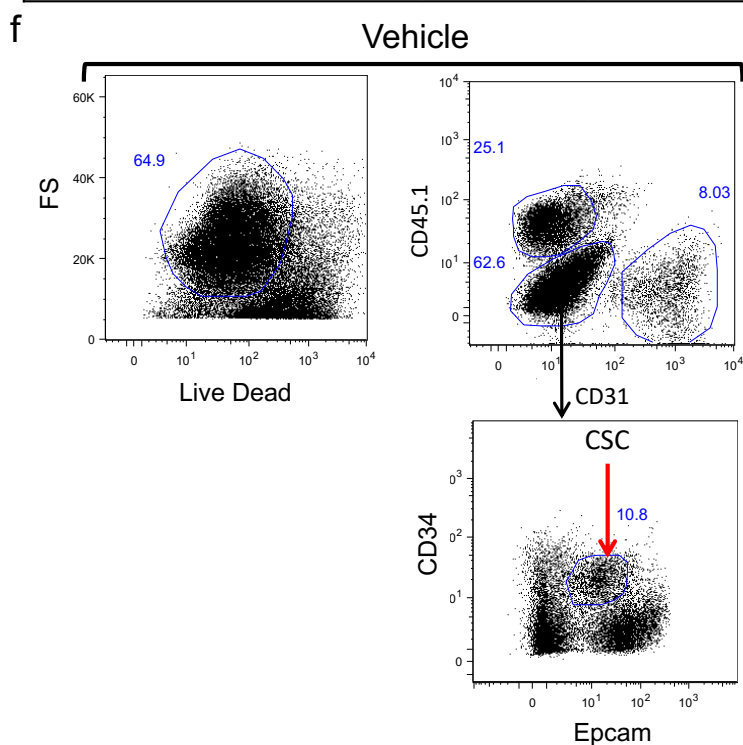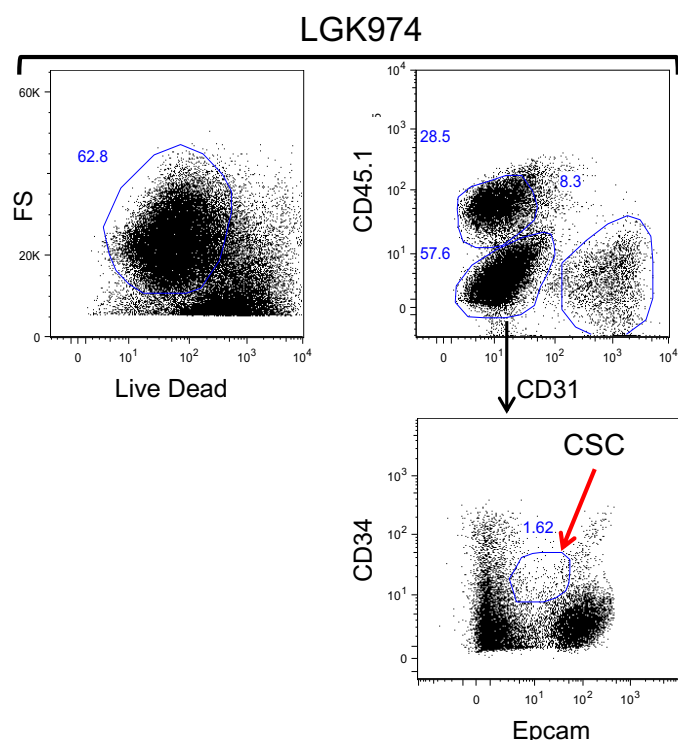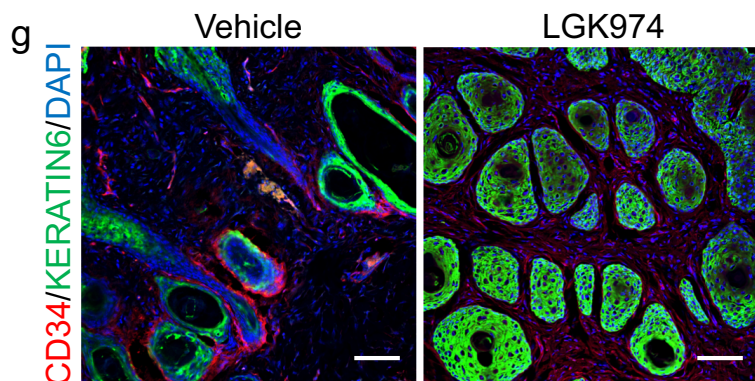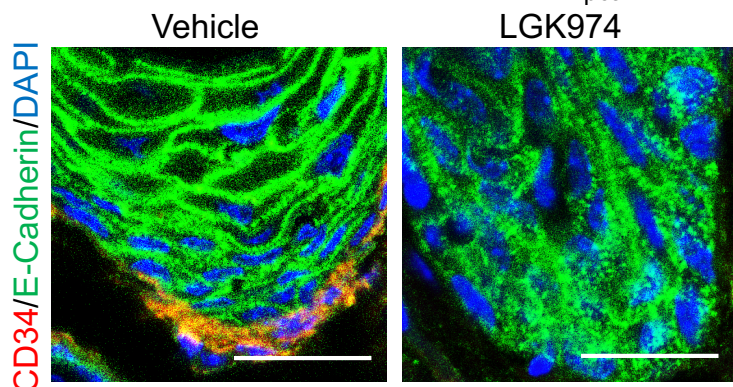

Supplement: 41388_2018_244_MOESM7_ESM.pdf [file 41388_2018_244_MOESM7_ESM.pdf]
